# Supplementary material for: Genetic and observational evidence supports a causal role of sex hormones on the development of asthma
Source: PubMed Central journal article supplement (PMC6585308; doi:10.1136/thoraxjnl-2018-212207), 2019-04-01
Supplement: thoraxjnl-2018-212207supp002.pdf [file thoraxjnl-2018-212207supp002.pdf]

| SNP (SHBG raising allele) | Outcome                   | Age  | Estimate [95%CI]           | std.error | p.value  | N   |
|---------------------------|---------------------------|------|----------------------------|-----------|----------|-----|
| rs17496332_G              | SHBG                      | 9.9  | 0.0525 [-0.108 , 0.213]    | 0.082042  | 0.522336 | 374 |
| rs17496332_G              | SHBG                      | 11.8 | 0.00735 [-0.147 , 0.162]   | 0.078966  | 0.925905 | 410 |
| rs17496332_G              | SHBG                      | 13.8 | -0.00952 [-0.184 , 0.165]  | 0.08925   | 0.915138 | 351 |
| rs17496332_G              | SHBG                      | 15.5 | 0.00184 [-0.157 , 0.161]   | 0.081251  | 0.981988 | 396 |
| rs17496332_G              | SHBG                      | 17.8 | -0.00511 [-0.167 , 0.157]  | 0.082786  | 0.950798 | 368 |
| rs17496332_G              | Bioavailable Testosterone | 9.9  | -0.00707 [-0.169 , 0.154]  | 0.082382  | 0.931662 | 373 |
| rs17496332_G              | Bioavailable Testosterone | 11.8 | 0.000132 [-0.156 , 0.157]  | 0.079839  | 0.998684 | 410 |
| rs17496332_G              | Bioavailable Testosterone | 13.8 | 0.118 [-0.0565 , 0.292]    | 0.088904  | 0.186159 | 349 |
| rs17496332_G              | Bioavailable Testosterone | 15.5 | 0.0294 [-0.13 , 0.189]     | 0.081308  | 0.717918 | 396 |
| rs17496332_G              | Bioavailable Testosterone | 17.8 | 0.00654 [-0.158 , 0.171]   | 0.083863  | 0.93793  | 357 |
| rs17496332_G              | Total Testosterone        | 9.9  | 0.0116 [-0.148 , 0.172]    | 0.081605  | 0.887255 | 373 |
| rs17496332_G              | Total Testosterone        | 11.8 | 0.0102 [-0.146 , 0.166]    | 0.079567  | 0.898232 | 410 |
| rs17496332_G              | Total Testosterone        | 13.8 | 0.0734 [-0.102 , 0.249]    | 0.089345  | 0.411962 | 349 |
| rs17496332_G              | Total Testosterone        | 15.5 | 0.0324 [-0.127 , 0.192]    | 0.081381  | 0.690486 | 396 |
| rs17496332_G              | Total Testosterone        | 17.8 | -0.00324 [-0.165 , 0.159]  | 0.082728  | 0.968799 | 357 |
| rs440837_G                | SHBG                      | 9.9  | 0.14 [-0.0337 , 0.314]     | 0.088693  | 0.115031 | 374 |
| rs440837_G                | SHBG                      | 11.8 | 0.0534 [-0.114 , 0.221]    | 0.085326  | 0.531917 | 410 |
| rs440837_G                | SHBG                      | 13.8 | 0.22 [0.0362 , 0.405]      | 0.094004  | 0.019621 | 351 |
| rs440837_G                | SHBG                      | 15.5 | 0.0551 [-0.111 , 0.221]    | 0.084711  | 0.516111 | 396 |
| rs440837_G                | SHBG                      | 17.8 | 0.0396 [-0.135 , 0.214]    | 0.08898   | 0.656325 | 368 |
| rs440837_G                | Bioavailable Testosterone | 9.9  | -0.133 [-0.308 , 0.0411]   | 0.089016  | 0.134935 | 373 |
| rs440837_G                | Bioavailable Testosterone | 11.8 | -0.0633 [-0.232 , 0.106]   | 0.086252  | 0.463581 | 410 |
| rs440837_G                | Bioavailable Testosterone | 13.8 | -0.177 [-0.361 , 0.00814]  | 0.094265  | 0.061867 | 349 |
| rs440837_G                | Bioavailable Testosterone | 15.5 | 0.0809 [-0.0852 , 0.247]   | 0.08473   | 0.340427 | 396 |
| rs440837_G                | Bioavailable Testosterone | 17.8 | -2.81e-05 [-0.177 , 0.177] | 0.090217  | 0.999752 | 357 |
| rs440837_G                | Total Testosterone        | 9.9  | 0.0153 [-0.158 , 0.189]    | 0.088456  | 0.863088 | 373 |
| rs440837_G                | Total Testosterone        | 11.8 | -0.0777 [-0.246 , 0.0907]  | 0.085929  | 0.366212 | 410 |
| rs440837_G                | Total Testosterone        | 13.8 | -0.128 [-0.314 , 0.058]    | 0.09482   | 0.178584 | 349 |
| rs440837_G                | Total Testosterone        | 15.5 | 0.125 [-0.0412 , 0.291]    | 0.084667  | 0.141443 | 396 |
| rs440837_G                | Total Testosterone        | 17.8 | -0.00722 [-0.182 , 0.167]  | 0.088994  | 0.935414 | 357 |
| rs7910927_G               | SHBG                      | 9.9  | 0.0258 [-0.118 , 0.169]    | 0.073136  | 0.724254 | 374 |
| rs7910927_G               | SHBG                      | 11.8 | -0.0144 [-0.151 , 0.123]   | 0.069913  | 0.83689  | 410 |

|             |                           |      |                           |          |          |     |
|-------------|---------------------------|------|---------------------------|----------|----------|-----|
| rs7910927_G | SHBG                      | 13.8 | 0.0928 [-0.0578 , 0.243]  | 0.076811 | 0.227875 | 351 |
| rs7910927_G | SHBG                      | 15.5 | -0.0697 [-0.211 , 0.0713] | 0.071933 | 0.332972 | 396 |
| rs7910927_G | SHBG                      | 17.8 | 0.101 [-0.0452 , 0.247]   | 0.074413 | 0.177033 | 368 |
| rs7910927_G | Bioavailable Testosterone | 9.9  | -0.0506 [-0.195 , 0.0936] | 0.073565 | 0.492434 | 373 |
| rs7910927_G | Bioavailable Testosterone | 11.8 | -0.0444 [-0.183 , 0.0941] | 0.070653 | 0.530152 | 410 |
| rs7910927_G | Bioavailable Testosterone | 13.8 | -0.0653 [-0.216 , 0.0854] | 0.076874 | 0.396204 | 349 |
| rs7910927_G | Bioavailable Testosterone | 15.5 | 0.0571 [-0.084 , 0.198]   | 0.072026 | 0.428096 | 396 |
| rs7910927_G | Bioavailable Testosterone | 17.8 | 0.019 [-0.128 , 0.166]    | 0.075079 | 0.800173 | 357 |
| rs7910927_G | Total Testosterone        | 9.9  | 0.00581 [-0.137 , 0.149]  | 0.072921 | 0.936553 | 373 |
| rs7910927_G | Total Testosterone        | 11.8 | -0.0299 [-0.168 , 0.108]  | 0.070434 | 0.671155 | 410 |
| rs7910927_G | Total Testosterone        | 13.8 | -0.0406 [-0.192 , 0.111]  | 0.07718  | 0.598965 | 349 |
| rs7910927_G | Total Testosterone        | 15.5 | 0.0495 [-0.0918 , 0.191]  | 0.072109 | 0.492556 | 396 |
| rs7910927_G | Total Testosterone        | 17.8 | 0.109 [-0.0358 , 0.254]   | 0.07383  | 0.141076 | 357 |
| rs4149056_T | SHBG                      | 9.9  | 0.00763 [-0.196 , 0.211]  | 0.103713 | 0.941368 | 374 |
| rs4149056_T | SHBG                      | 11.8 | -0.0139 [-0.209 , 0.181]  | 0.099284 | 0.888466 | 410 |
| rs4149056_T | SHBG                      | 13.8 | 0.09 [-0.129 , 0.309]     | 0.111607 | 0.420474 | 351 |
| rs4149056_T | SHBG                      | 15.5 | 0.102 [-0.0932 , 0.297]   | 0.099628 | 0.306055 | 396 |
| rs4149056_T | SHBG                      | 17.8 | 0.119 [-0.0852 , 0.322]   | 0.10394  | 0.254845 | 368 |
| rs4149056_T | Bioavailable Testosterone | 9.9  | 0.0801 [-0.124 , 0.284]   | 0.104079 | 0.441915 | 373 |
| rs4149056_T | Bioavailable Testosterone | 11.8 | 0.0261 [-0.171 , 0.223]   | 0.100374 | 0.794621 | 410 |
| rs4149056_T | Bioavailable Testosterone | 13.8 | -0.053 [-0.272 , 0.166]   | 0.111504 | 0.634969 | 349 |
| rs4149056_T | Bioavailable Testosterone | 15.5 | 0.0829 [-0.113 , 0.278]   | 0.099764 | 0.406739 | 396 |
| rs4149056_T | Bioavailable Testosterone | 17.8 | 0.0292 [-0.176 , 0.234]   | 0.104518 | 0.779818 | 357 |
| rs4149056_T | Total Testosterone        | 9.9  | 0.169 [-0.0322 , 0.371]   | 0.10279  | 0.100567 | 373 |
| rs4149056_T | Total Testosterone        | 11.8 | 0.0787 [-0.117 , 0.275]   | 0.099964 | 0.431416 | 410 |
| rs4149056_T | Total Testosterone        | 13.8 | 0.0015 [-0.218 , 0.221]   | 0.111911 | 0.989302 | 349 |
| rs4149056_T | Total Testosterone        | 15.5 | 0.197 [0.00249 , 0.392]   | 0.099427 | 0.047873 | 396 |
| rs4149056_T | Total Testosterone        | 17.8 | 0.136 [-0.0661 , 0.337]   | 0.102848 | 0.188544 | 357 |
| rs8023580_C | SHBG                      | 9.9  | 0.228 [0.0595 , 0.396]    | 0.085766 | 0.00833  | 374 |
| rs8023580_C | SHBG                      | 11.8 | 0.0842 [-0.0783 , 0.247]  | 0.08292  | 0.310555 | 410 |
| rs8023580_C | SHBG                      | 13.8 | 0.045 [-0.135 , 0.225]    | 0.091767 | 0.624321 | 351 |
| rs8023580_C | SHBG                      | 15.5 | 0.00863 [-0.155 , 0.172]  | 0.083294 | 0.917498 | 396 |
| rs8023580_C | SHBG                      | 17.8 | 0.0845 [-0.0869 , 0.256]  | 0.087474 | 0.334709 | 368 |

|              |                           |      |                           |          |          |     |
|--------------|---------------------------|------|---------------------------|----------|----------|-----|
| rs8023580_C  | Bioavailable Testosterone | 9.9  | -0.243 [-0.411 , -0.0743] | 0.085951 | 0.005013 | 373 |
| rs8023580_C  | Bioavailable Testosterone | 11.8 | 0.0231 [-0.141 , 0.188]   | 0.083939 | 0.782885 | 410 |
| rs8023580_C  | Bioavailable Testosterone | 13.8 | -0.012 [-0.192 , 0.168]   | 0.091877 | 0.895824 | 349 |
| rs8023580_C  | Bioavailable Testosterone | 15.5 | 0.0112 [-0.152 , 0.175]   | 0.083366 | 0.893485 | 396 |
| rs8023580_C  | Bioavailable Testosterone | 17.8 | -0.141 [-0.315 , 0.0317]  | 0.088312 | 0.110194 | 357 |
| rs8023580_C  | Total Testosterone        | 9.9  | 0.0836 [-0.0849 , 0.252]  | 0.085988 | 0.33153  | 373 |
| rs8023580_C  | Total Testosterone        | 11.8 | 0.0892 [-0.0746 , 0.253]  | 0.08354  | 0.286367 | 410 |
| rs8023580_C  | Total Testosterone        | 13.8 | -0.00178 [-0.182 , 0.179] | 0.092183 | 0.984572 | 349 |
| rs8023580_C  | Total Testosterone        | 15.5 | 0.072 [-0.0914 , 0.235]   | 0.083363 | 0.388569 | 396 |
| rs8023580_C  | Total Testosterone        | 17.8 | -0.0755 [-0.247 , 0.0957] | 0.087352 | 0.387828 | 357 |
| rs780093_C   | SHBG                      | 9.9  | 0.094 [-0.0558 , 0.244]   | 0.076458 | 0.219652 | 374 |
| rs780093_C   | SHBG                      | 11.8 | 0.124 [-0.0212 , 0.269]   | 0.074094 | 0.095053 | 410 |
| rs780093_C   | SHBG                      | 13.8 | 0.0367 [-0.126 , 0.199]   | 0.083047 | 0.659094 | 351 |
| rs780093_C   | SHBG                      | 15.5 | 0.033 [-0.117 , 0.183]    | 0.076602 | 0.666598 | 396 |
| rs780093_C   | SHBG                      | 17.8 | 0.0529 [-0.0979 , 0.204]  | 0.076944 | 0.492098 | 368 |
| rs780093_C   | Bioavailable Testosterone | 9.9  | -0.0974 [-0.248 , 0.0534] | 0.076942 | 0.206509 | 373 |
| rs780093_C   | Bioavailable Testosterone | 11.8 | -0.117 [-0.264 , 0.0297]  | 0.074946 | 0.118684 | 410 |
| rs780093_C   | Bioavailable Testosterone | 13.8 | 0.0161 [-0.148 , 0.18]    | 0.083521 | 0.847347 | 349 |
| rs780093_C   | Bioavailable Testosterone | 15.5 | 0.0139 [-0.136 , 0.164]   | 0.076685 | 0.855971 | 396 |
| rs780093_C   | Bioavailable Testosterone | 17.8 | -0.0811 [-0.234 , 0.0723] | 0.07825  | 0.300968 | 357 |
| rs780093_C   | Total Testosterone        | 9.9  | 0.115 [-0.0339 , 0.265]   | 0.076143 | 0.130797 | 373 |
| rs780093_C   | Total Testosterone        | 11.8 | -0.105 [-0.252 , 0.0413]  | 0.074737 | 0.16025  | 410 |
| rs780093_C   | Total Testosterone        | 13.8 | 0.0591 [-0.105 , 0.223]   | 0.083739 | 0.481111 | 349 |
| rs780093_C   | Total Testosterone        | 15.5 | 0.0856 [-0.0646 , 0.236]  | 0.076632 | 0.264823 | 396 |
| rs780093_C   | Total Testosterone        | 17.8 | 0.0403 [-0.111 , 0.192]   | 0.077283 | 0.602574 | 357 |
| rs12150660_T | SHBG                      | 9.9  | 0.411 [0.235 , 0.586]     | 0.089482 | 6.16E-06 | 374 |
| rs12150660_T | SHBG                      | 11.8 | 0.389 [0.226 , 0.552]     | 0.083364 | 4.23E-06 | 410 |
| rs12150660_T | SHBG                      | 13.8 | 0.236 [0.057 , 0.416]     | 0.091447 | 0.010203 | 351 |
| rs12150660_T | SHBG                      | 15.5 | 0.377 [0.208 , 0.545]     | 0.085864 | 1.50E-05 | 396 |
| rs12150660_T | SHBG                      | 17.8 | 0.375 [0.203 , 0.546]     | 0.08759  | 2.44E-05 | 368 |
| rs12150660_T | Bioavailable Testosterone | 9.9  | -0.365 [-0.542 , -0.188]  | 0.090387 | 6.68E-05 | 373 |
| rs12150660_T | Bioavailable Testosterone | 11.8 | -0.149 [-0.318 , 0.0202]  | 0.086287 | 0.08516  | 410 |
| rs12150660_T | Bioavailable Testosterone | 13.8 | 0.0992 [-0.0817 , 0.28]   | 0.092296 | 0.283298 | 349 |

|              |                           |      |                            |          |          |     |
|--------------|---------------------------|------|----------------------------|----------|----------|-----|
| rs12150660_T | Bioavailable Testosterone | 15.5 | -0.0985 [-0.271 , 0.0739]  | 0.087975 | 0.263634 | 396 |
| rs12150660_T | Bioavailable Testosterone | 17.8 | -0.228 [-0.404 , -0.0518]  | 0.089872 | 0.011644 | 357 |
| rs12150660_T | Total Testosterone        | 9.9  | -0.0273 [-0.207 , 0.152]   | 0.091579 | 0.76614  | 373 |
| rs12150660_T | Total Testosterone        | 11.8 | -0.0685 [-0.238 , 0.101]   | 0.086254 | 0.427483 | 410 |
| rs12150660_T | Total Testosterone        | 13.8 | 0.272 [0.0924 , 0.451]     | 0.091538 | 0.003207 | 349 |
| rs12150660_T | Total Testosterone        | 15.5 | 0.299 [0.128 , 0.469]      | 0.086844 | 0.000653 | 396 |
| rs12150660_T | Total Testosterone        | 17.8 | 0.304 [0.131 , 0.476]      | 0.087951 | 0.000624 | 357 |
| rs1641537_C  | SHBG                      | 9.9  | 0.356 [0.151 , 0.56]       | 0.104361 | 0.000725 | 374 |
| rs1641537_C  | SHBG                      | 11.8 | 0.286 [0.088 , 0.484]      | 0.101149 | 0.004899 | 410 |
| rs1641537_C  | SHBG                      | 13.8 | 0.158 [-0.0652 , 0.38]     | 0.113651 | 0.166699 | 351 |
| rs1641537_C  | SHBG                      | 15.5 | 0.122 [-0.0814 , 0.326]    | 0.103994 | 0.239796 | 396 |
| rs1641537_C  | SHBG                      | 17.8 | 0.103 [-0.115 , 0.32]      | 0.110857 | 0.354554 | 368 |
| rs1641537_C  | Bioavailable Testosterone | 9.9  | -0.453 [-0.657 , -0.25]    | 0.103785 | 1.65E-05 | 373 |
| rs1641537_C  | Bioavailable Testosterone | 11.8 | -0.151 [-0.353 , 0.0511]   | 0.103032 | 0.144072 | 410 |
| rs1641537_C  | Bioavailable Testosterone | 13.8 | -0.0813 [-0.305 , 0.142]   | 0.114085 | 0.476651 | 349 |
| rs1641537_C  | Bioavailable Testosterone | 15.5 | 0.0214 [-0.183 , 0.226]    | 0.104272 | 0.837707 | 396 |
| rs1641537_C  | Bioavailable Testosterone | 17.8 | -0.171 [-0.39 , 0.0484]    | 0.111895 | 0.127517 | 357 |
| rs1641537_C  | Total Testosterone        | 9.9  | -0.188 [-0.394 , 0.0181]   | 0.105088 | 0.074747 | 373 |
| rs1641537_C  | Total Testosterone        | 11.8 | 0.00117 [-0.201 , 0.203]   | 0.102966 | 0.990961 | 410 |
| rs1641537_C  | Total Testosterone        | 13.8 | 0.0884 [-0.136 , 0.313]    | 0.114447 | 0.44059  | 349 |
| rs1641537_C  | Total Testosterone        | 15.5 | 0.22 [0.0167 , 0.423]      | 0.103753 | 0.034591 | 396 |
| rs1641537_C  | Total Testosterone        | 17.8 | 0.0683 [-0.149 , 0.285]    | 0.110701 | 0.537708 | 357 |
| rs1625895_C  | SHBG                      | 9.9  | 0.178 [-0.0847 , 0.441]    | 0.134134 | 0.184822 | 374 |
| rs1625895_C  | SHBG                      | 11.8 | -0.0542 [-0.316 , 0.208]   | 0.133583 | 0.685201 | 410 |
| rs1625895_C  | SHBG                      | 13.8 | 0.055 [-0.224 , 0.334]     | 0.142224 | 0.699055 | 351 |
| rs1625895_C  | SHBG                      | 15.5 | 0.282 [0.0242 , 0.54]      | 0.131693 | 0.032717 | 396 |
| rs1625895_C  | SHBG                      | 17.8 | 0.0825 [-0.176 , 0.341]    | 0.131744 | 0.531405 | 368 |
| rs1625895_C  | Bioavailable Testosterone | 9.9  | -0.0901 [-0.354 , 0.174]   | 0.134744 | 0.504291 | 373 |
| rs1625895_C  | Bioavailable Testosterone | 11.8 | 0.241 [-0.0224 , 0.505]    | 0.13453  | 0.073639 | 410 |
| rs1625895_C  | Bioavailable Testosterone | 13.8 | 0.0844 [-0.194 , 0.363]    | 0.141914 | 0.552471 | 349 |
| rs1625895_C  | Bioavailable Testosterone | 15.5 | -0.26 [-0.518 , -0.000922] | 0.131935 | 0.049923 | 396 |
| rs1625895_C  | Bioavailable Testosterone | 17.8 | -0.00648 [-0.266 , 0.253]  | 0.132378 | 0.960998 | 357 |
| rs1625895_C  | Total Testosterone        | 9.9  | 0.0626 [-0.199 , 0.324]    | 0.133518 | 0.639702 | 373 |

|             |                    |      |                          |          |          |     |
|-------------|--------------------|------|--------------------------|----------|----------|-----|
| rs1625895_C | Total Testosterone | 11.8 | 0.217 [-0.0462 , 0.48]   | 0.134179 | 0.106916 | 410 |
| rs1625895_C | Total Testosterone | 13.8 | 0.071 [-0.208 , 0.35]    | 0.142406 | 0.618563 | 349 |
| rs1625895_C | Total Testosterone | 15.5 | -0.0255 [-0.286 , 0.235] | 0.132733 | 0.847765 | 396 |
| rs1625895_C | Total Testosterone | 17.8 | 0.123 [-0.133 , 0.378]   | 0.130414 | 0.347641 | 357 |
